# Supplementary material
Source: MDPI journal article supplement (https://www.mdpi.com/2304-6740/11/6/241)
Supplement: s1 [file s1]

## SUPPLEMENTARY INFORMATION

**«Novel BODIPY conjugates with terpenenoid moiety: Design, Spectral Characteristics, and Possibilities for Practical Application»** by Galina. B. Guseva <sup>1</sup>, Elena, V. Antina <sup>1</sup>, Mikhail B. Berezin <sup>1</sup>, Liliya E. Nikitina <sup>2,3</sup>, Ilmir R. Gilfanov <sup>3,4</sup>, Roman S. Pavelyev <sup>3</sup>, Svetlana A. Lisovskaya <sup>2,3,5</sup>, Larisa L. Frolova <sup>6</sup>, Olga V. Ostolopovskaya <sup>2,3</sup>, Ilfat Z. Rakhmatullin <sup>7</sup>, Vladimir V. Klochkov <sup>7</sup>, Elena Yu. Trizna <sup>3</sup>, and Airat R. Kayumov <sup>3,\*</sup>✉

<sup>1</sup> *G.A. Krestov Institute of Solution Chemistry of the Russian Academy of Sciences, 153045 Ivanovo, Russia*

<sup>2</sup> *Faculty of Medicine and Biology, Kazan State Medical University, 420012 Kazan, Russia*

<sup>3</sup> *Institute of Fundamental Medicine and Biology, Kazan Federal University, 420008 Kazan, Russia*

<sup>4</sup> *Institute of Petroleum, Chemistry and Nanotechnologies, Kazan National Research Technological University, 420015 Kazan, Russia*

<sup>5</sup> *Scientific Research Institute of Epidemiology and Microbiology, 420015 Kazan, Russia*

<sup>6</sup> *Institute of Chemistry, Federal Research Center “Komi Scientific Centre”, Ural Branch, Russian Academy of Sciences, 167000 Syktyvkar, Russia*

<sup>7</sup> *Institute of Physics, Kazan Federal University, 420008 Kazan, Russia*

---

✉ Corresponding Author.

E-mail address: [kairatr@yandex.ru](mailto:kairatr@yandex.ru) (A. R. K.)

NMR spectra were recorded on a Bruker AVANCE-II-500 spectrometer with operating frequencies of 500 MHz (for  $^1\text{H}$ ) and 125 MHz (for  $^{13}\text{C}$ ) in  $\text{CDCl}_3$  solvent using standard Bruker pulse programs. The numbering of atoms in the description of the NMR spectra differs from the numbering in the names of compounds.

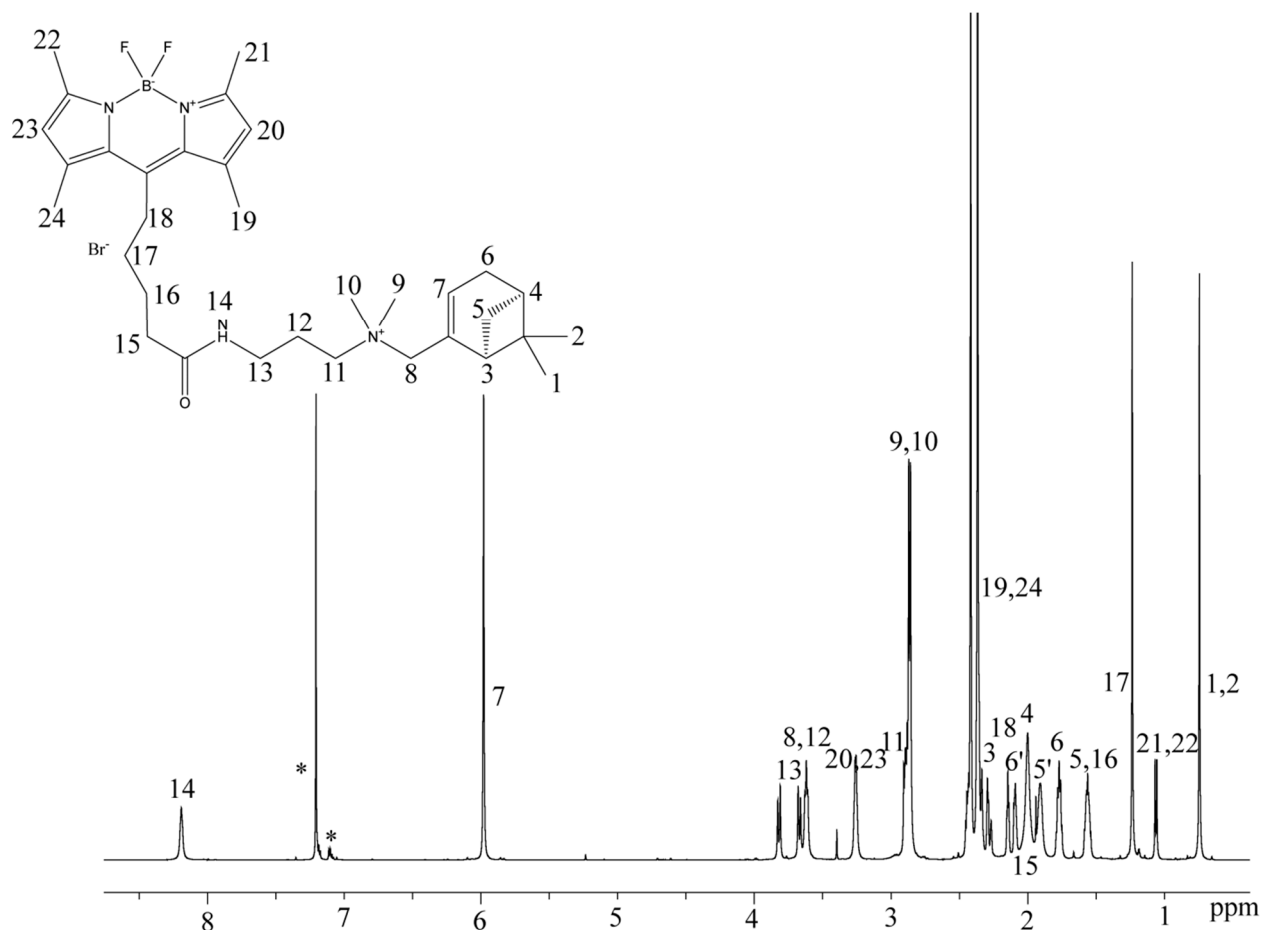

**Figure S1.**  $^1\text{H}$  NMR spectrum of  $\text{BF}_2$ -*meso*-(4-pentanamido-*N*-(((1*S*,5*R*)-6,6-dimethylbicyclo[3.1.1]hept-2-en-2-yl)methyl)-*N,N*-dimethylpropan-1-aminium)-3,3',5,5'-tetramethyl-2,2'-dipyrrromethene bromide (**10**) in  $\text{CDCl}_3$ .

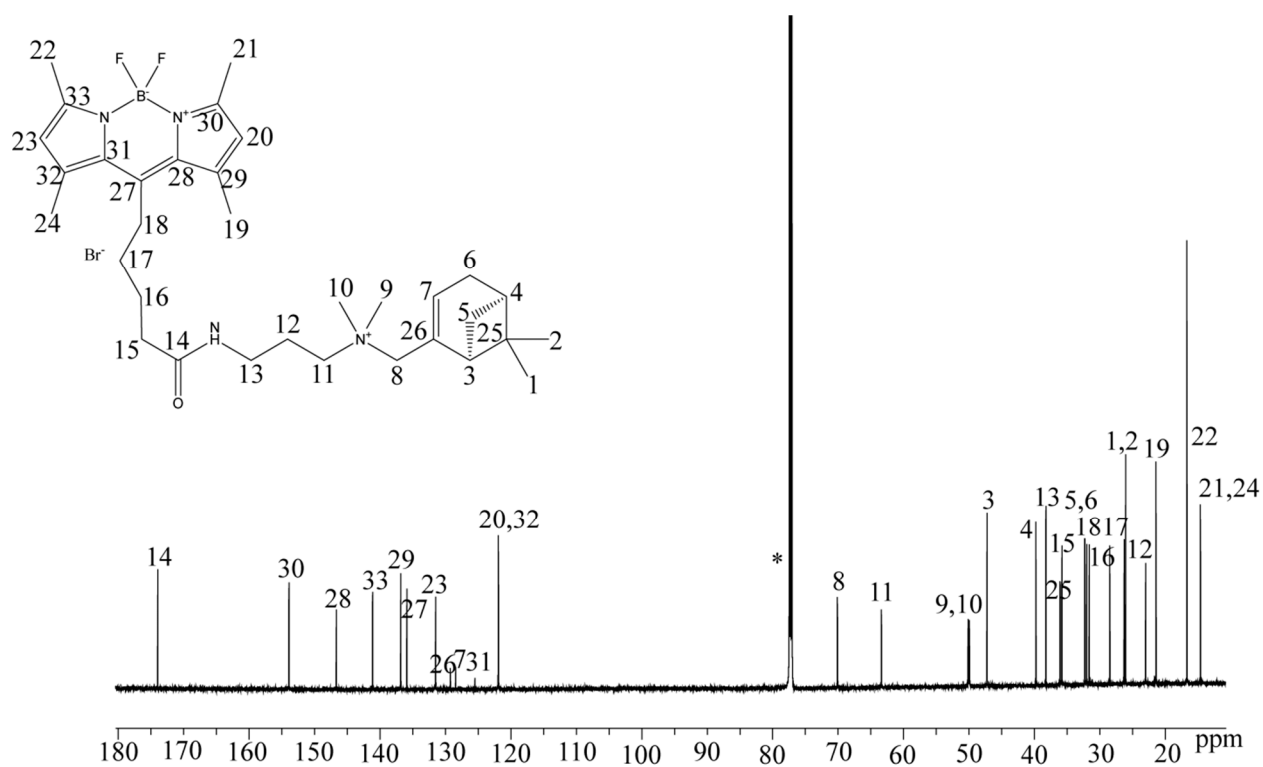

**Figure S2.**  $^{13}\text{C}$  NMR spectrum of  $\text{BF}_2$ -*meso*-(4-pentanamido-*N*-(((1*S*,5*R*)-6,6-dimethylbicyclo[3.1.1]hept-2-en-2-yl)methyl)-*N,N*-dimethylpropan-1-aminium)-3,3',5,5'-tetramethyl-2,2'-dipyrromethene bromide (**10**) in  $\text{CDCl}_3$ .

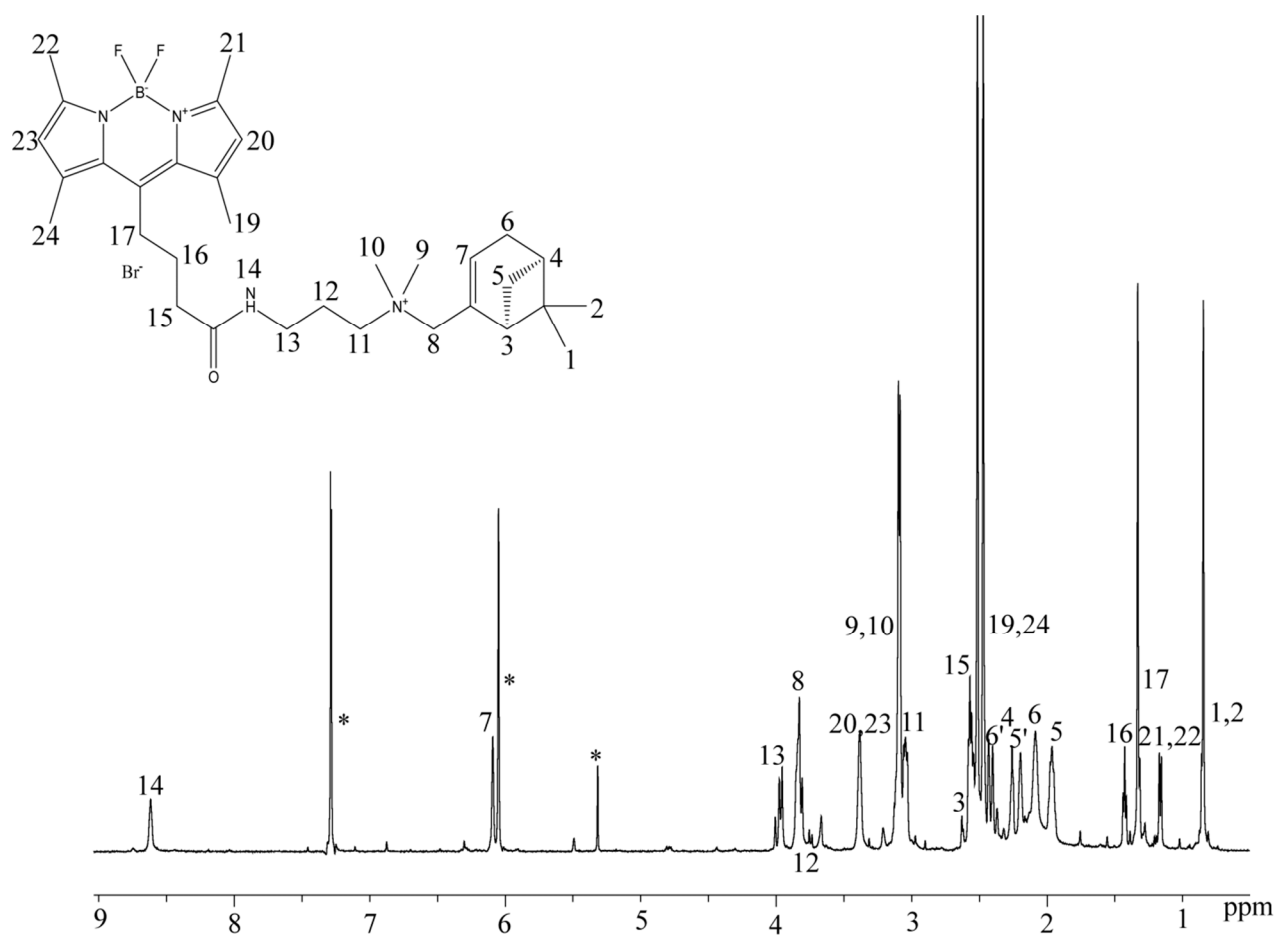

**Figure S3.**  $^1\text{H}$  NMR spectrum of  $\text{BF}_2$ -*meso*-(4-butanamido-*N*-(((1*S*,5*R*)-6,6-dimethylbicyclo[3.1.1]hept-2-en-2-yl)methyl)-*N,N*-dimethylpropan-1-aminium)-3,3',5,5'-tetramethyl-2,2'-dipyrrromethene bromide (**11**) in  $\text{CDCl}_3$ .

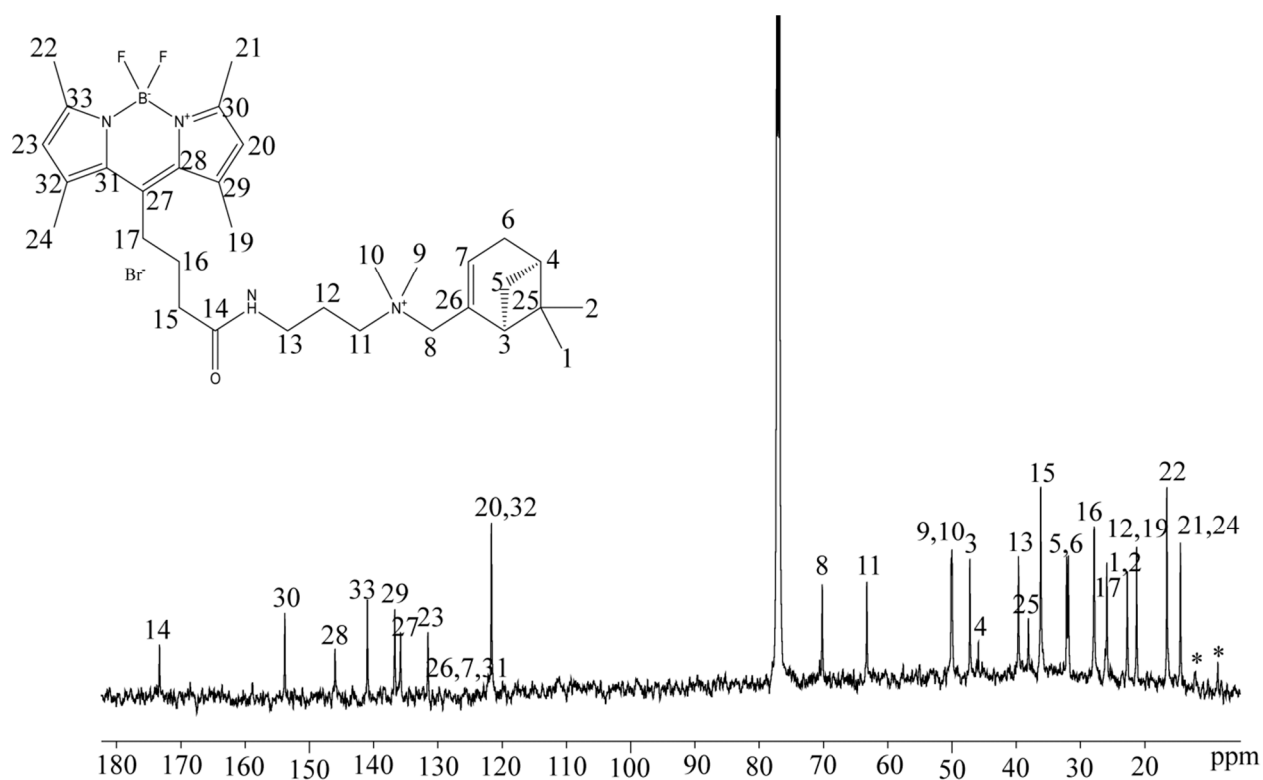

**Figure S4.**  $^{13}\text{C}$  NMR spectrum of  $\text{BF}_2$ -*meso*-(4-butanamido-*N*-(((1*S*,5*R*)-6,6-dimethylbicyclo[3.1.1]hept-2-en-2-yl)methyl)-*N,N*-dimethylpropan-1-aminium)-3,3',5,5'-tetramethyl-2,2'-dipyrromethene bromide (**11**) in  $\text{CDCl}_3$ .
